# Supplementary material for: Rpd3L HDAC links H3K4me3 to transcriptional repression memory
Source: PubMed Central journal article supplement — Nucleic Acids Res. 2018 Jun 30;46(16):8261–74. doi: 10.1093/nar/gky573 (PMC6144869; doi:10.1093/nar/gky573), 2018-06-30
Supplement: gky573_supplemental_figures.pdf [file gky573_supplemental_figures.pdf]

**Figure S1**

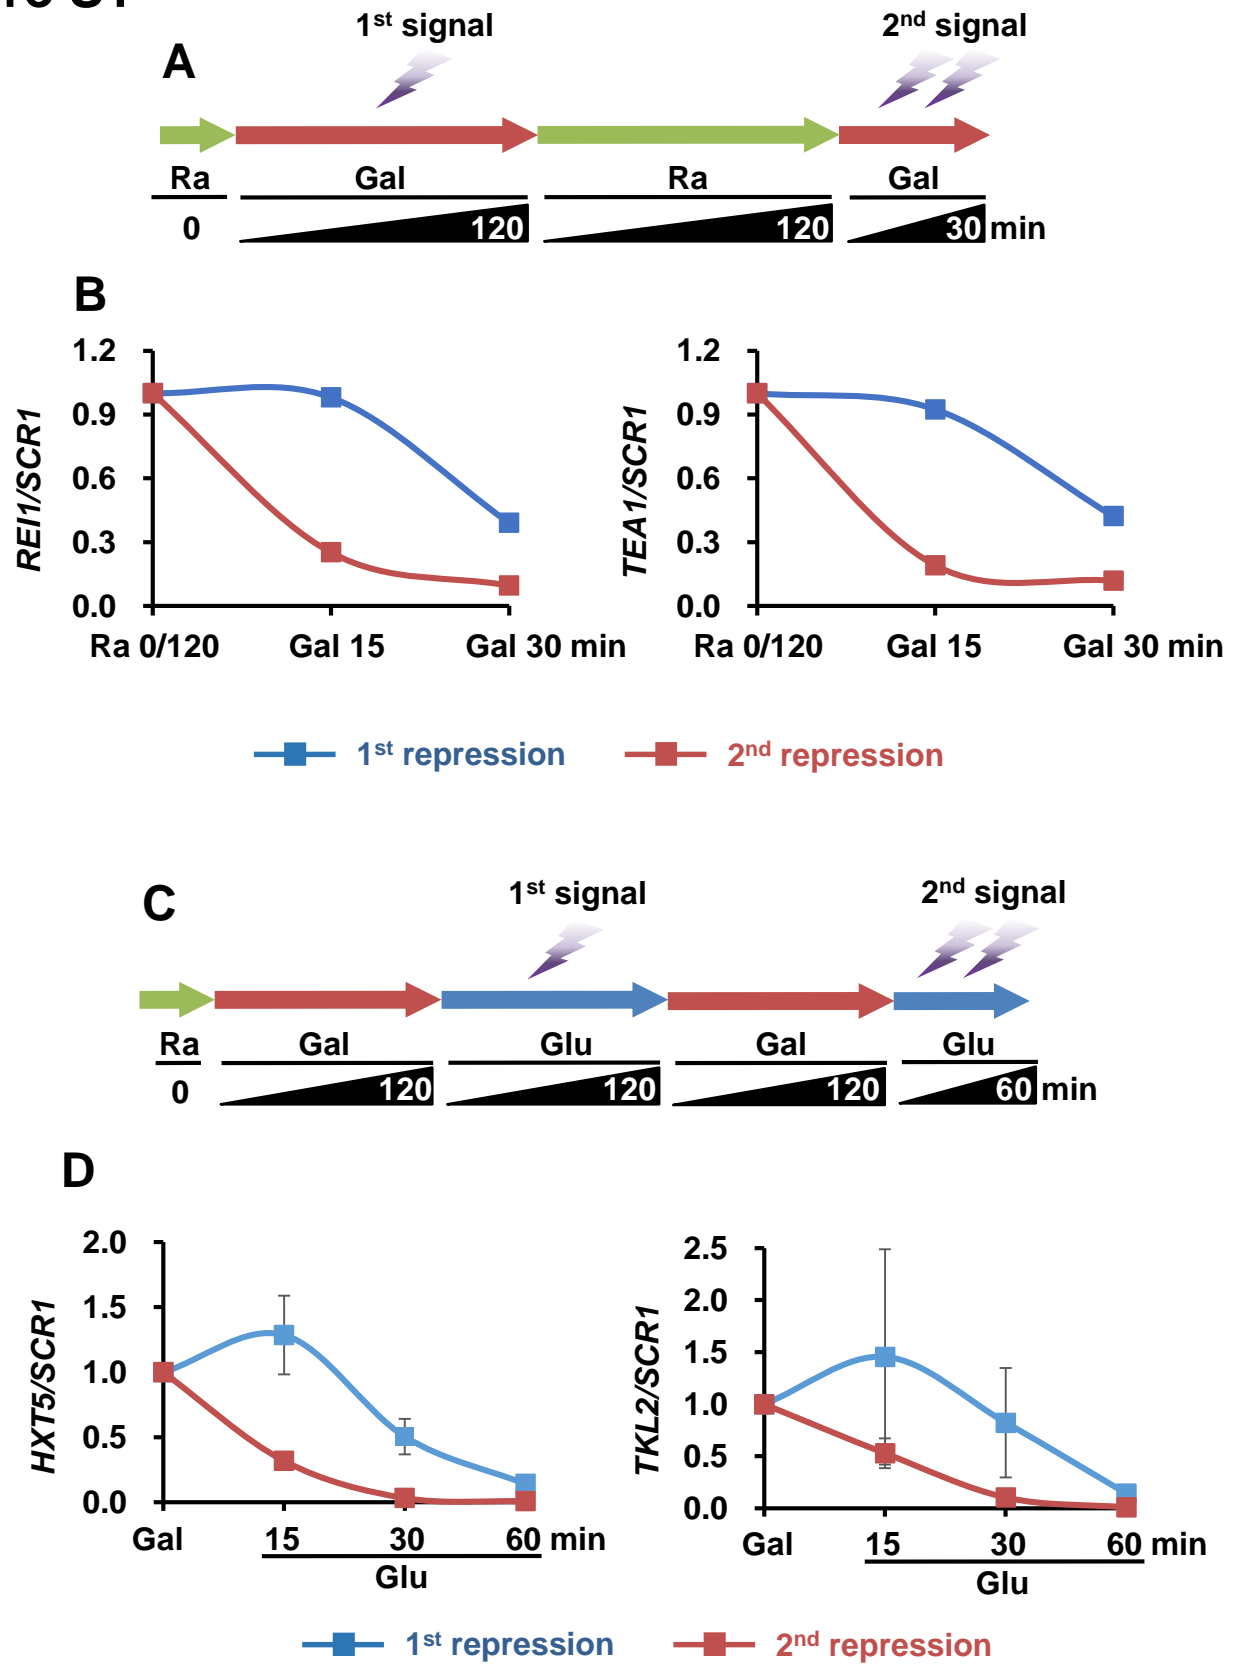

# Figure S1

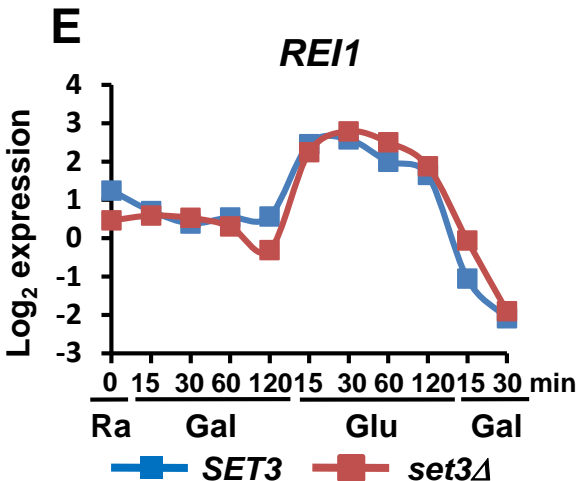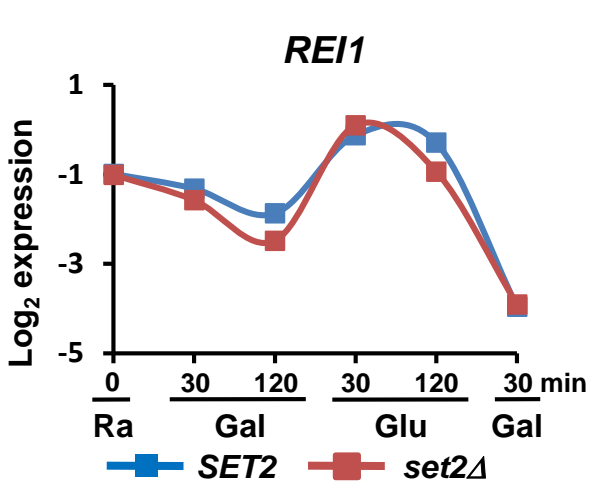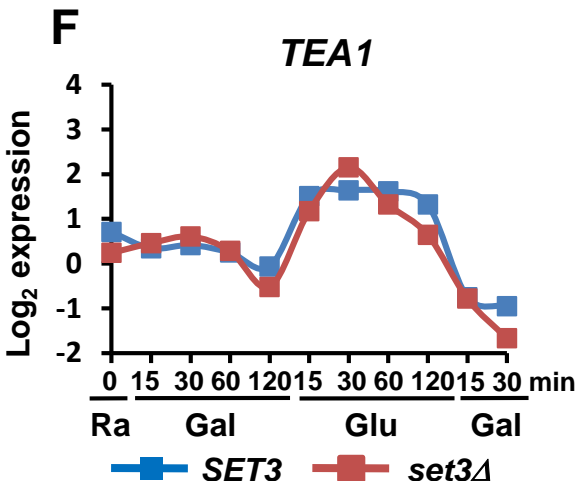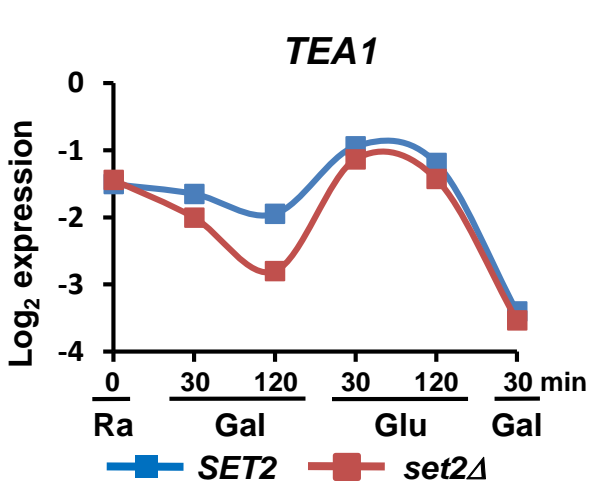

**Figure S2**

**A**

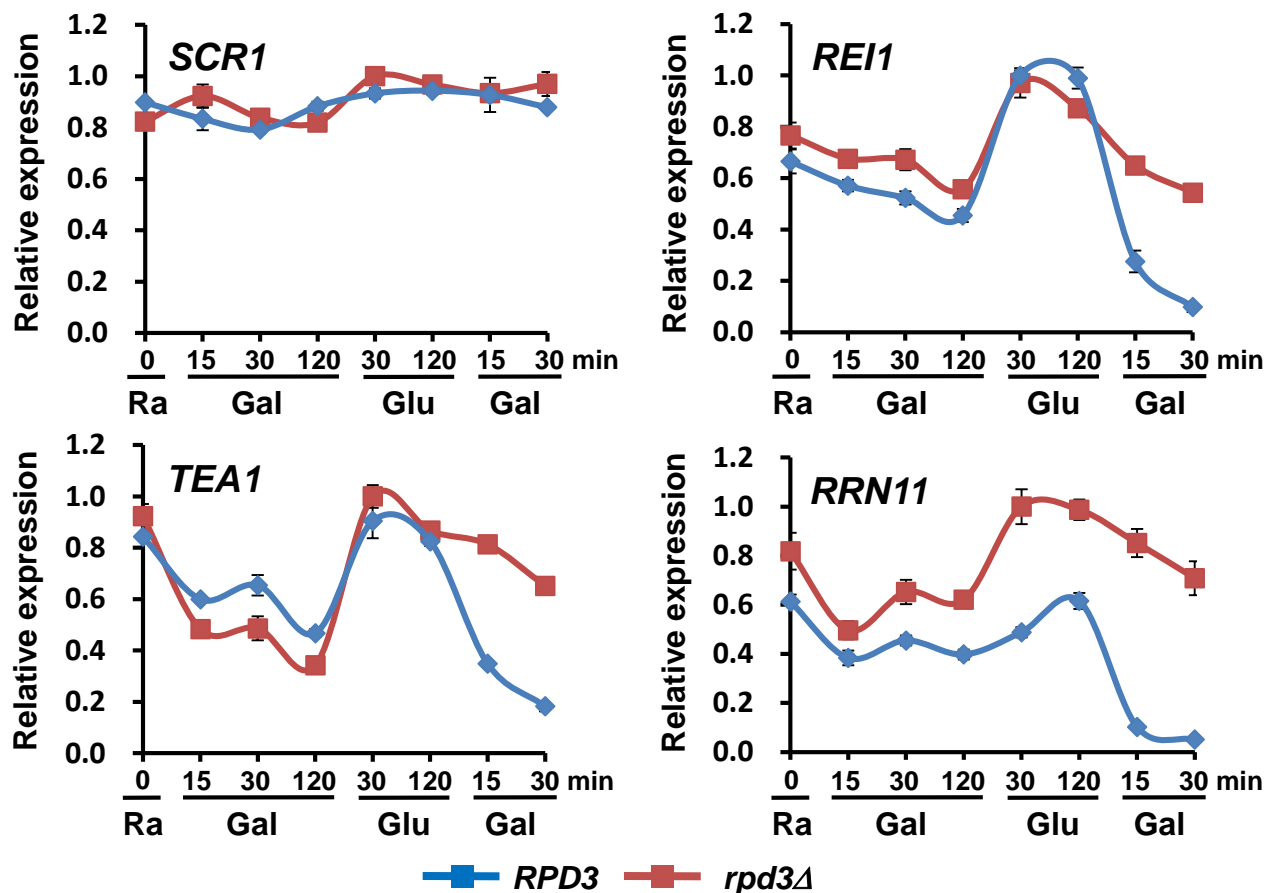

**B**

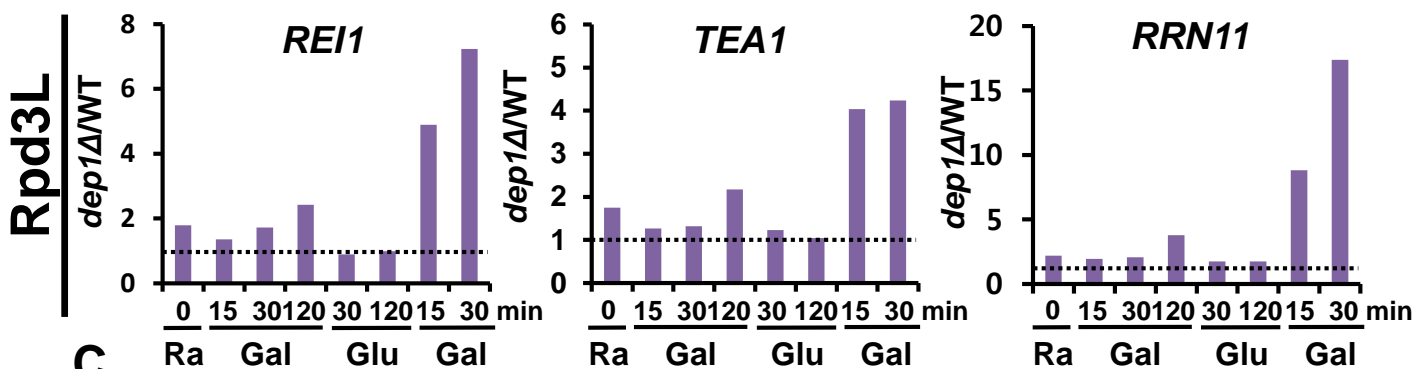

**C**

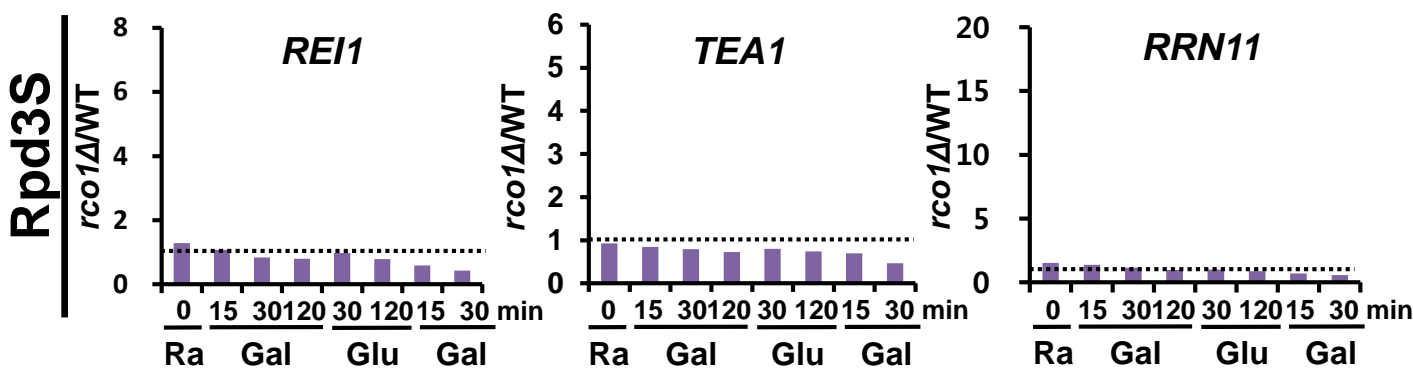

**Figure S3**

**A**

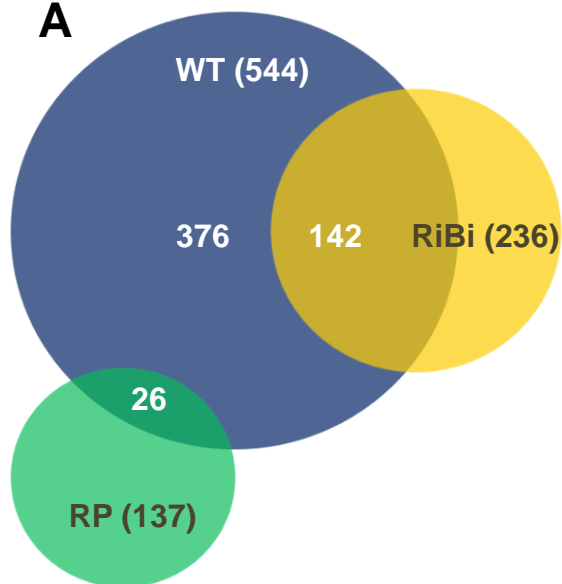

**B**

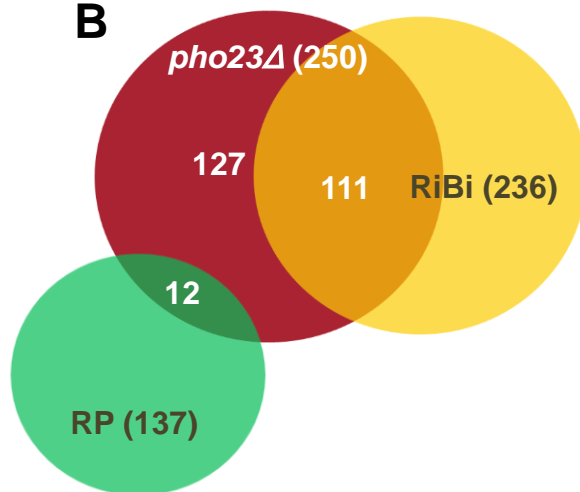

**C**

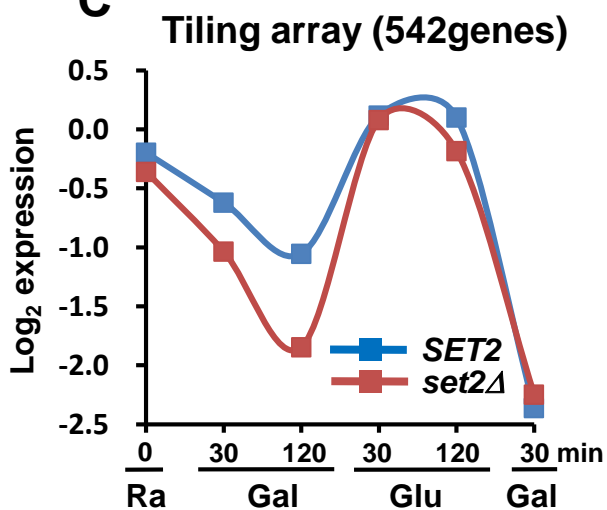

**D**

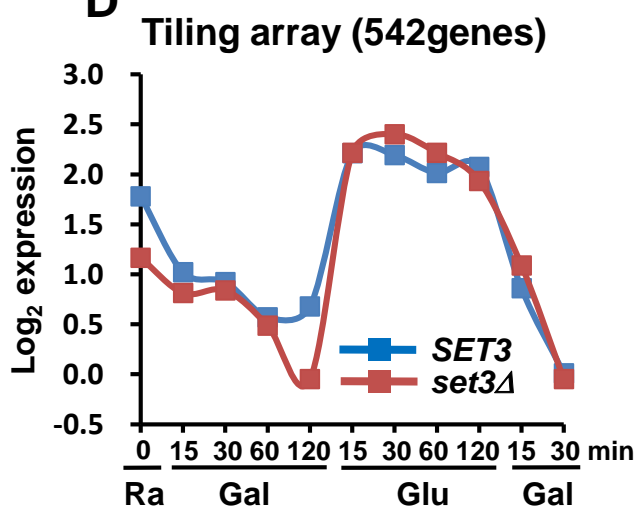

**E**

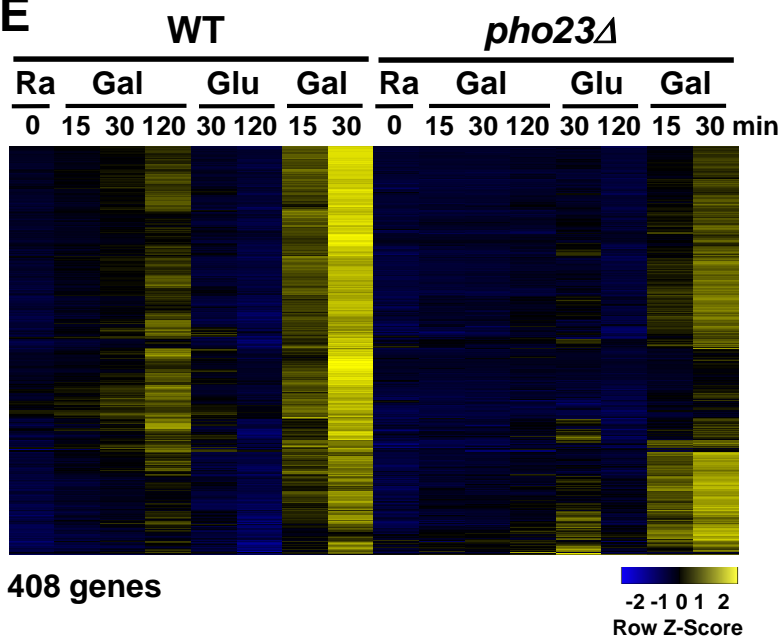

**F**

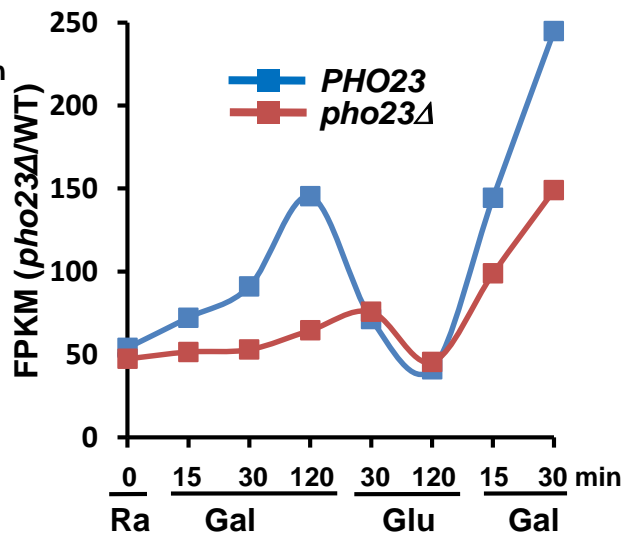

**Figure S4**

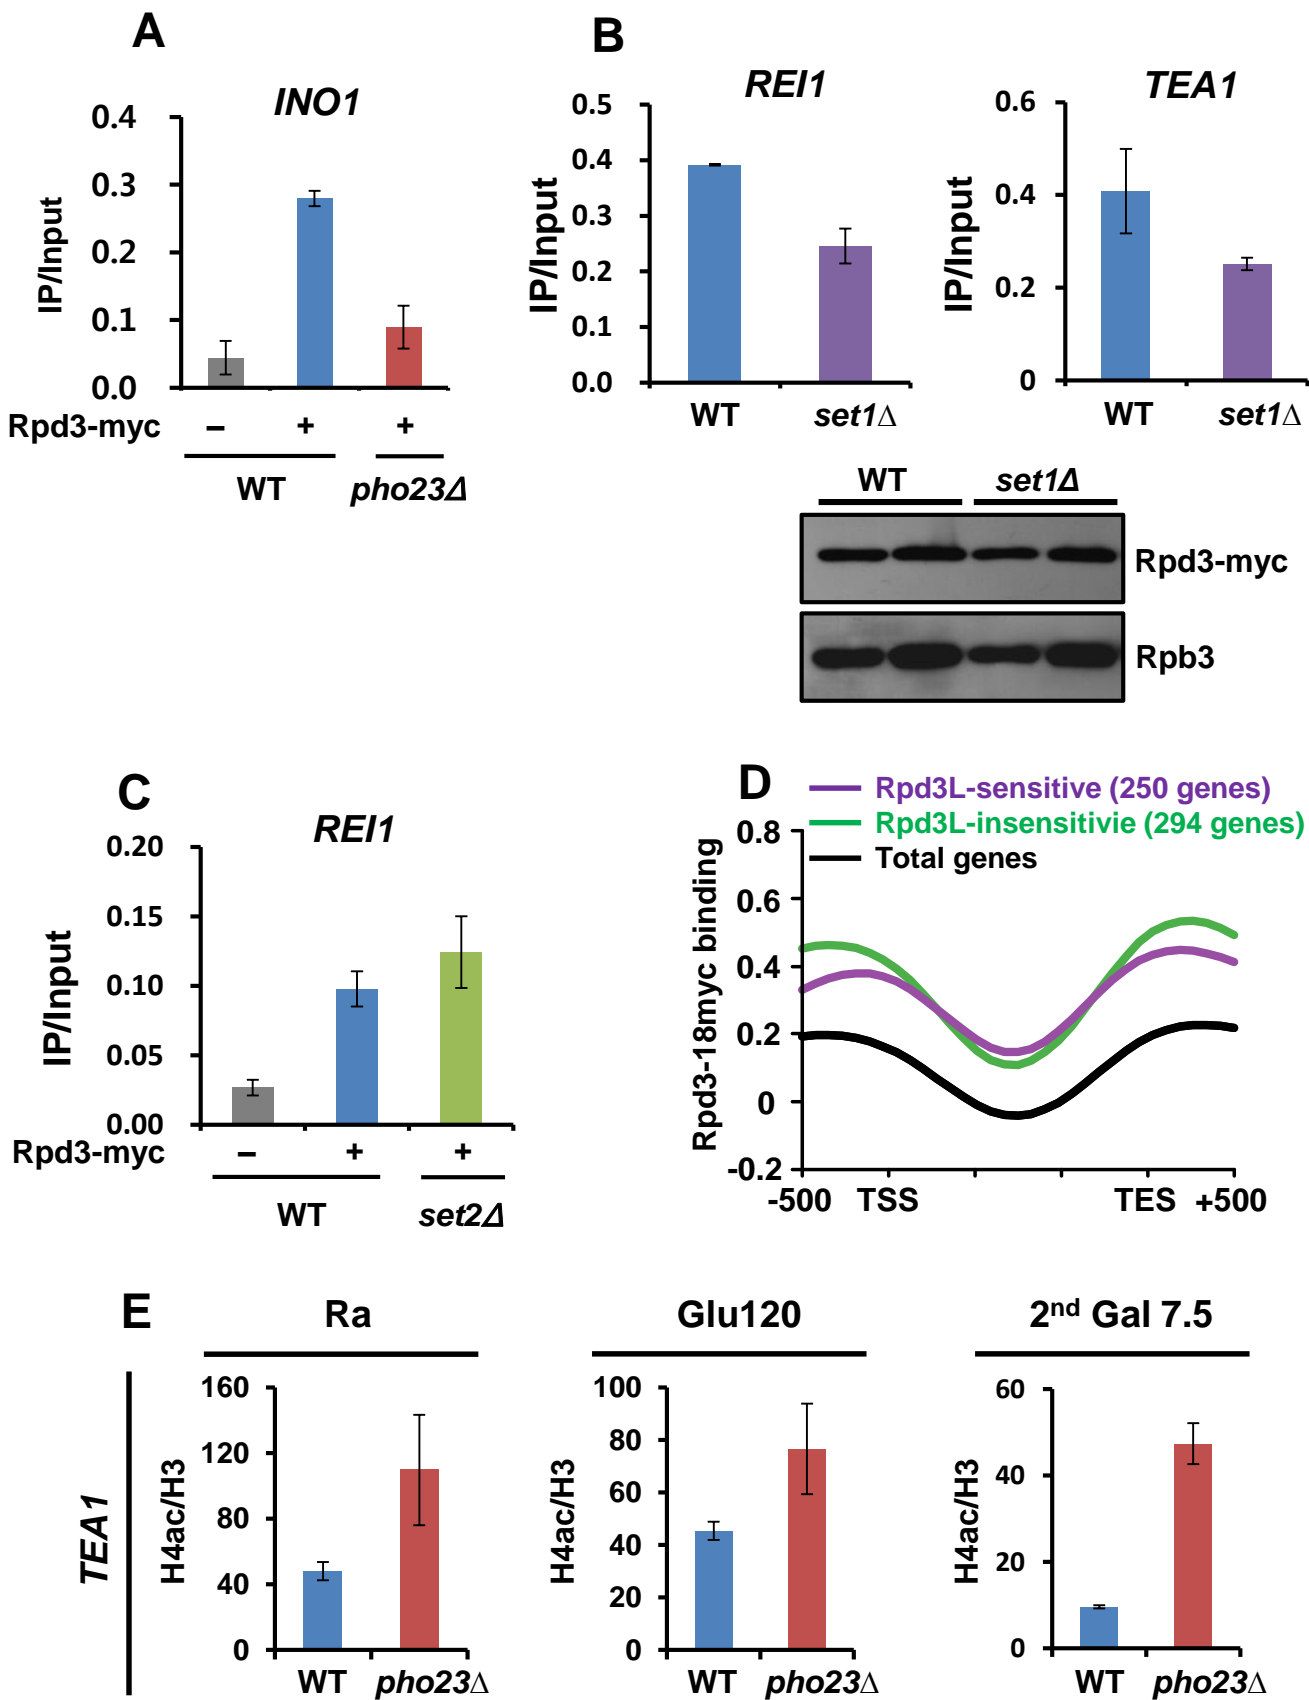

**Figure S5**

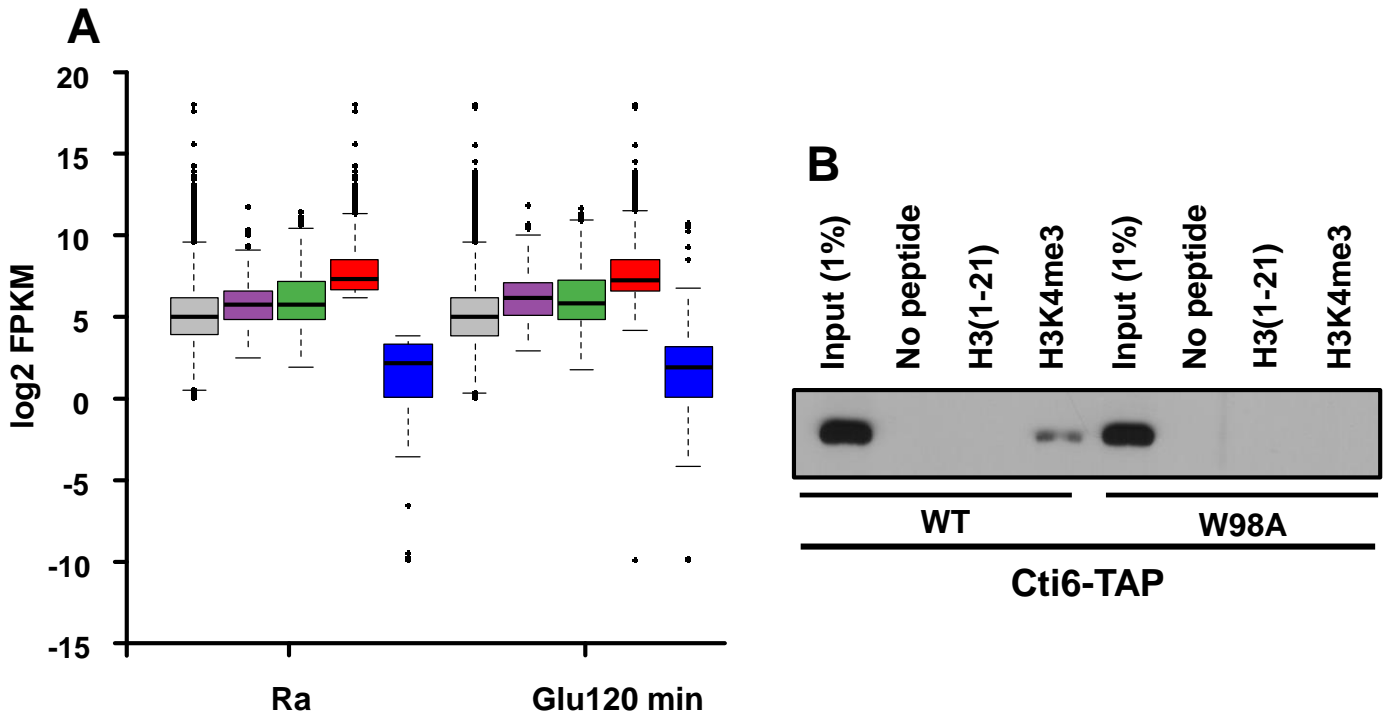

Total genes (6181)  
 Pho23-sensitive (250)  
 Pho23-insensitive (294)  
 Top 25% (1545)  
 Bottom 25% (1545)

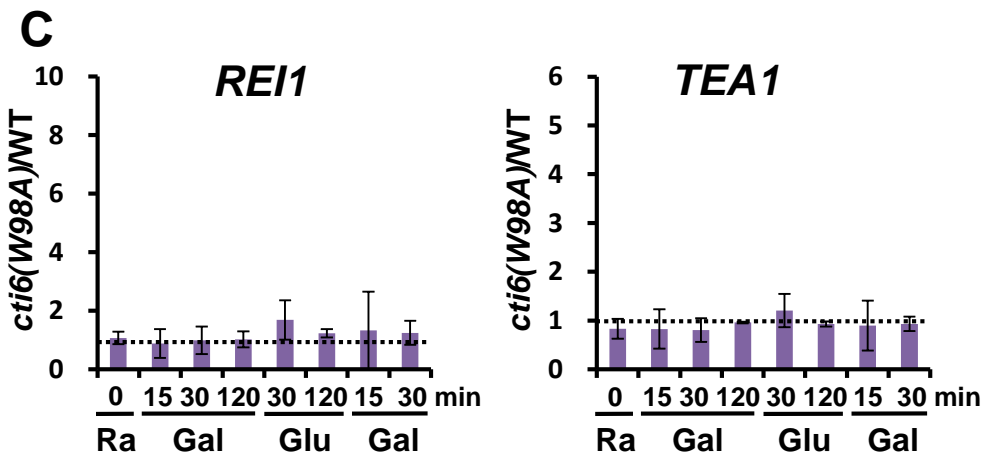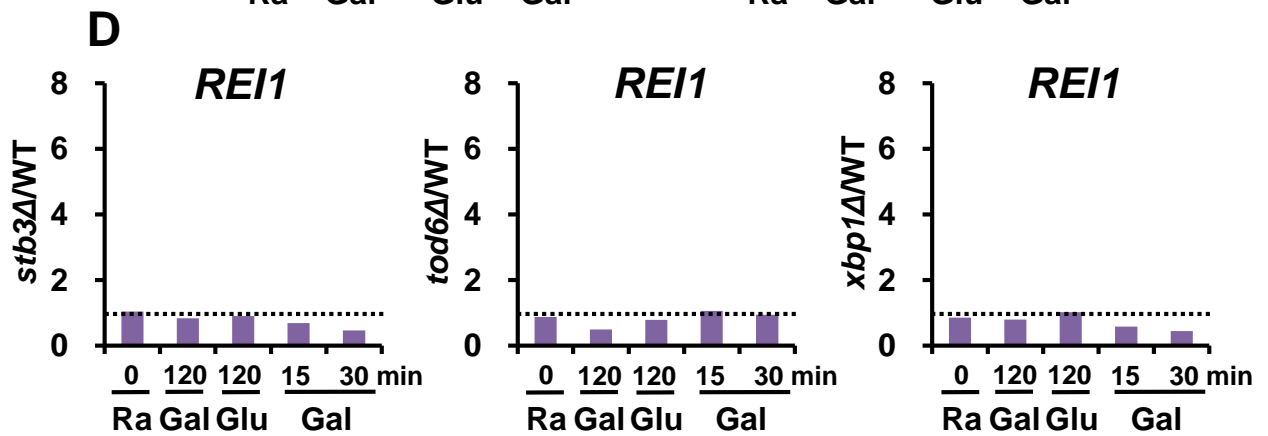

## Supplementary Figure Legends

**Supplementary Figure 1.** Transcriptional repression memory **(A)** Schematic representation of the time course experiments to monitor changes in transcript levels under an alternative carbon-source shift. **(B)** Wild type cells were grown in SC-raffinose medium and then sequentially shifted to SC media containing the indicated carbon sources for the times specified in Supplementary Figure S1A. *REI1* and *TEA1* mRNA levels were determined by RT-PCR with two independent RNA samples. *SCR1* was used as an internal control. **(C)** Schematic representation of the time course experiments to monitor changes in transcript levels of glucose-repressed genes. **(D)** Wild type cells were grown in SC-raffinose medium and then sequentially shifted to SC media containing the indicated carbon sources for the times specified in Supplementary Figure S1C. *HXT5* and *TKL2* mRNA levels were determined by RT-PCR with two independent RNA samples. *SCR1* was used as an internal control. **(E)** Set3 HDAC did not affect the kinetics of *REI1* or *TEA1* repression. Log<sub>2</sub> expression levels of *REI1* or *TEA1* during carbon-source shifts from Kim et al (2012). **(F)** Set2 was not involved in *REI1* or *TEA1* repression. Log<sub>2</sub> expression levels of *REI1* or *TEA1* during carbon source shifts from Kim et al (2016).

**Supplementary Figure 2.** Rpd3L, but not Rpd3S, is required for TREM **(A)** The original data for Figure 2B. *RPD3* and *rpd3Δ* cells were grown in SC-raffinose medium and then sequentially shifted to SC media containing the indicated carbon sources for the times specified in Figure 2A. Transcript levels were determined by RT-PCR with two independent RNA samples. **(B)** Deletion of *DEP1* delayed TREM. Transcript levels of TREM genes were analyzed as in Figure 2A. **(C)** Loss of Rco1, a subunit of Rpd3S, had no effect on TREM. Transcript levels of TREM genes were analyzed as in Figure 2A.

**Supplementary Figure 3.** Rpd3L-mediated regulation of TREM. **(A)** The number of RiBi (yellow circle) and RP (green circle) genes that showed TREM during carbon-source shifts. **(B)** RiBi (yellow circle) and RP (green circle) genes that were regulated by Pho23. **(C)** Loss of Set2 increased the rate of gene repression during the first galactose pulse. Averaged expression profiles of 542 TREM genes in *SET2* and *set2Δ* cells from Kim et al (2016). **(D)** Set3 had no effect on repression of TREM genes. Averaged expression profiles of 542 TREM genes in *SET3* and *set3Δ* cells from Kim et al (2012). **(E)** 408 genes that displayed faster induction kinetics during the second galactose incubation. These genes showed memory of their previous active states. **(F)** Average expression profiles of 408 genes from Supplementary Figure S4E. Deletion of *PHO23* significantly delayed the rate of gene induction.

**Supplementary Figure 4.** Rpd3L binding to TREM genes **(A)** Rpd3 binding to *INO1* gene. PCR analysis of the precipitated DNA was carried out on the *INO1* promoter as in Figure 4A. **(B)** Deletion of *SET1* slightly reduced Rpd3 binding to the promoters of TREM genes. ChIP was done with the indicated strains expressing Rpd3-myc protein as in Figure 4A. The bottom panel shows Rpd3 proteins levels in the indicated strains. Rpb3 was used a loading control. **(C)** Set2 was not required for Rpd3 binding. ChIP was performed with the indicated strains expressing Rpd3-myc as in Figure 4A. **(D)** Rpd3 occupancy of TREM genes was analyzed as in Figure 4C. The graph shows the average occupancy of Rpd3 for total genes (black), for 250 Rpd3L-sensitive genes (purple), and for 294 Rpd3L-insensitive genes (green). **(E)** Loss of Pho23 delayed deacetylation at the *TEA1* promoter upon the second galactose incubation. Histone acetylation at the indicated time points was analyzed as in Figure 4E.

**Supplementary Figure 5.** The Cti6 PHD finger and gene specific repressors do not affect TREM. **(A)** Averaged expression profiles of total genes (6181), Rpd3L-sensitive genes



(250), Rpd3L-insensitive genes (294), top 25% highly transcribed genes (1545), and bottom 25% inactive genes (1545). **(B)** The Cti6 PHD finger binds to H3K4me3. Histone peptide binding assays were performed with whole-cell extracts expressing Cti6-TAP or a PHD finger mutant, *cti6* W98A-TAP, and 1 $\mu$ g of the indicated histone peptides immobilized on magnetic beads. Precipitated Cti6 protein was analyzed by immunoblot with anti-TAP antibody. **(C)** The interaction between the Cti6 PHD finger and H3K4me3 was not required for TREM. Transcript levels from the indicated cells were determined by RT-PCR as in Figure 2B. The ratios of transcript levels in *cti6* W98A over those in *CTI6* strains were plotted. **(D)** Wild type and the indicated mutant strains were grown in SC-raffinose medium and then sequentially shifted to SC media containing the indicated carbon sources for the times specified in the upper panel. mRNA levels were measured by RT-PCR with two independent RNA samples. The ratios of the transcript levels in the mutants over those in wild type were plotted.

**Table S1. Strains used in this study.**

| Strain            | Genotype                                                                                                                                                      | Source or Reference                   |
|-------------------|---------------------------------------------------------------------------------------------------------------------------------------------------------------|---------------------------------------|
| BY4741            | MATa, ura3Δ0, leu2Δ0, his3Δ1, met15Δ0                                                                                                                         | Saccharomyces Genome Deletion Project |
| YSB787            | MATa, bur1Δ::HIS3, ura3-52, leu2Δ1, trp1Δ63, his3Δ200, lys2Δ202 ( <i>pRS316-BUR1</i> )                                                                        | Keogh et al., 2005                    |
| YSB1002           | MATa, bur1Δ::HIS3, ura3-52 or ura3Δ0, leu2Δ1 or leu2Δ0, trp1Δ63, his3Δ200 or his3Δ1, lys2Δ202 or LYS2, met15Δ0 or MET15, set2Δ::KanMX ( <i>pRS316-BUR1</i> )  | M. Keogh                              |
| YSB1064           | MATa, bur1Δ::HIS3, ura3-52 or ura3Δ0, leu2Δ1 or leu2Δ0, trp1Δ63, his3Δ200 or his3Δ1, lys2Δ202 or LYS2, met15Δ0 or MET15, set3Δ::KanMX ( <i>pRS316-BUR1</i> )  | M. Keogh                              |
| YSB1850           | MATa, bur1Δ::HIS3, ura3-52 or ura3Δ0, leu2Δ1 or leu2Δ0, trp1Δ63, his3Δ200 or his3Δ1, lys2Δ202 or LYS2, met15Δ0 or MET15, rpd3Δ::KanMX ( <i>pRS316-BUR1</i> )  | M. Keogh                              |
| YSB1319           | MATa, bur1Δ::HIS3, ura3-52 or ura3Δ0, leu2Δ1 or leu2Δ0, trp1Δ63, his3Δ200 or his3Δ1, lys2Δ202 or LYS2, met15Δ0 or MET15, pho23Δ::KanMX ( <i>pRS316-BUR1</i> ) | S. Buratowski                         |
| YSB1849           | MATa, bur1Δ::HIS3, ura3-52 or ura3Δ0, leu2Δ1 or leu2Δ0, trp1Δ63, his3Δ200 or his3Δ1, lys2Δ202 or LYS2, met15Δ0 or MET15, rco1Δ::KanMX ( <i>pRS316-BUR1</i> )  | M. Keogh                              |
| YSB1321           | MATa, bur1Δ::HIS3, ura3-52 or ura3Δ0, leu2Δ1 or leu2Δ0, his3Δ200 or his3Δ1, lys2Δ202 or LYS2, met15Δ0 or MET15, dep1Δ::KanMX ( <i>pRS316-BUR1</i> )           | S. Buratowski                         |
| YTK84,<br>YTK85   | MATa, ura3Δ0, leu2Δ0, his3Δ1, met15Δ0, pho23(W305A)                                                                                                           | This study                            |
| YTK302,<br>YTK303 | MATa, ura3Δ0, leu2Δ0, his3Δ1, met15Δ0, cti6(W98A)                                                                                                             | This study                            |
| YF2111            | MATa, RPD3::18MYC::TRP1, ura3-52, leu2::hisG, trp1::hisG                                                                                                      | Bumgarner et al., 2009                |
| YTK282,           | MATa, pho23Δ::KanMX, RPD3::18MYC::TRP1, ura3-52, leu2::hisG, trp1::hisG                                                                                       | This study                            |

|        |                                                                        |            |
|--------|------------------------------------------------------------------------|------------|
| 283    |                                                                        |            |
| YTK331 | MATa, set1Δ::KanMX, RPD3::18MYC::TRP1, ura3-52, leu2::hisG, trp1::hisG | This study |
| YTK299 | MATa, set2Δ::KanMX, RPD3::18MYC::TRP1, ura3-52, leu2::hisG, trp1::hisG | This study |
| YTK304 | MATa, leu2Δ0, his3Δ1, met15Δ0, trp1::ura3                              | This study |
| YTK339 | MATa, PHO23::18MYC::TRP1, leu2Δ0, his3Δ1, met15Δ0, trp1::ura3          | This study |
| YTK378 | MATa, pho23(W305A)::18MYC::TRP1, leu2Δ0, his3Δ1, met15Δ0, trp1::ura3   | This study |
| YTK363 | MATa, CTI6::TAP::HIS3, ura3Δ0, leu2Δ0, his3Δ1, met15Δ0                 | This study |
| YTK364 | MATa, cti6(W98A)::TAP::HIS3, ura3Δ0, leu2Δ0, his3Δ1, met15Δ0           | This study |
| YTK222 | MATa, stb3Δ::KanMX, ura3Δ0, leu2Δ0, his3Δ1, met15Δ0                    | This study |
| YTK224 | MATa, tod6Δ::KanMX, ura3Δ0, leu2Δ0, his3Δ1, met15Δ0                    | This study |
| YTK252 | MATa, xbp1Δ::KanMX, ura3Δ0, leu2Δ0, his3Δ1, met15Δ0                    | This study |

Keogh et al. (2005) Cotranscriptional Set2 methylation of histone H3 lysine 36 recruits a repressive Rpd3 complex. *Cell*. 123, 593-605.

Bumgarner et al. (2009) Toggle involving cis-interfering noncoding RNAs controls variegated gene expression in yeast. *PNAS*. 106, 18321-18326.

**Table S2. Oligonucleotides used in this study.**

| Gene         | Sequences                                                  |
|--------------|------------------------------------------------------------|
| <i>SCR1</i>  | (F) GAAGTGTCCC GGCTATAATAAA<br>(R) GACGCTGGATAAAACTCCCC    |
| <i>REI1</i>  | (F) GAGCACAATAAGCACTTCAAAGA<br>(R) ACAAATGTTCCCAAGACCAATC  |
| <i>RRN11</i> | (F) CATAACTGGTCGCTTGCATATAA<br>(R) TTGACACATCCATTGTAAGAAGT |
| <i>TEA1</i>  | (F) AGGACTAAACGATGATAATCCCA                                |

|                         |                                                                                                                                                           |
|-------------------------|-----------------------------------------------------------------------------------------------------------------------------------------------------------|
|                         | (R) TTCTTGGAGTGATTGAAGAATCC                                                                                                                               |
| <i>TKL2</i>             | (F) GAAGACTGTTGTGGAACCCG<br>(R) TTCGGTAAATGCTTTTCCCAAC                                                                                                    |
| <i>HXT5</i>             | (F) CAAACTCTGTCCAATGGAGG<br>(R) TAGCTCTTGCTAAGGACCGC                                                                                                      |
| <i>STL1</i>             | (F) CCAAATGATG AGGAAGTTAT AAC<br>(R) AAATTGCGTT GAAGCTGCAA TC                                                                                             |
| <i>TEL VI</i>           | (F) TTTCGATCAAACGCGTCAGG<br>(R) CGAGACAACGACAGGAAATAC                                                                                                     |
| <i>REI1 (prom.)</i>     | (F) TAACATTATTACCACGGCGA<br>(R) CGTATTGTTACTGATATGCT                                                                                                      |
| <i>TEA1 (prom.)</i>     | (F) CAAAAATGGAAAGTAGGTATGGG<br>(R) TTCATTCTTGTTTGGCCACA                                                                                                   |
| <i>RRN11 (prom.)</i>    | (F) GCATCGCTAACATCTAAAAAAGT<br>(R) AGGGACTTCAAACATGGTTTAT                                                                                                 |
| <i>INO1 (prom.)</i>     | (F) GATGCGGAATCGAAAGTGTT<br>(R) AAATTAACATTGCCGCCAAC                                                                                                      |
| <i>PHO23(W305)-CORE</i> | (F) TGGCATACGGGGAAATGGTGGGGTGTGATGGCGCAGACTGTGAGCTAGAA GAGCTCGTTTTCGACTGG<br>(R) CACTTGCCCTTAGGTAGAGTTTCGAGTCCAATACATGGCAAATGGAACCA TCCTTACCATTAAGTTGATC  |
| <i>PHO23(W305 A)</i>    | (F)<br>TGGCATACGGGGAAATGGTGGGGTGTGATGGCGCAGACTGTGAGCTAGAAGCCTTCCATTTGCCATGTATTGGACTCGAAACTCTACCTA<br>AGGGCAAGTG                                           |
| <i>CTI6(W98)-CORE</i>   | (F) ATACTCCAGATGACTCCGGATTTTTTCATTCAATGTGAGCAGTGCAGTTCC GAGCTCGTTTTCGACTGG<br>(R) TTATCAGGTGCGTTGTCTTGAGTAATACTCACACAATAACCGTGCTGCCA TCCTTACCATTAAGTTGATC |

|                             |                                                                                                                                                   |
|-----------------------------|---------------------------------------------------------------------------------------------------------------------------------------------------|
| <i>CT16(W98A)</i>           | (F)<br>ATACTCCAGATGACTCCGGATTTTTCATTCAATGTGAGCAGTGCAGTTCCGCACAGCACGGTTATTGTGTGAGTATTA<br>CTCAAGACAACGCACCTGATAA                                   |
| <i>Pho23-Cterm-<br/>myc</i> | (F) CTACCTAAGGGCAAGTGGTATTGCGACGACTGCAAAAAAAAAACTGTCCGGTTCTGCTGCTAGTGGT<br>(R) ATTTAGTAGATATTTTCCTTAAGGCGATATTCGCCCAGAGCTATTCCTCGAGGCCAGAAGACTAAG |
